# Supplementary material for: Marine heatwaves in the Mediterranean Sea: a convolutional neural network study for extreme event prediction
Source: Copernicus journal article supplement (doi:10.5194/os-21-897-2025), 2025-05-07
Supplement: Supplementary file 1 [file os-21-897-2025-supplement.pdf]

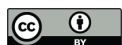

*Supplement of*

## **Marine heatwaves in the Mediterranean Sea: a convolutional neural network study for extreme event prediction**

**Antonios Parasyris et al.**

*Correspondence to:* Antonios Parasyris ([antonisparasyris@gmail.com](mailto:antonisparasyris@gmail.com))

The copyright of individual parts of the supplement might differ from the article licence.

Supplementary Material

**Table S1:** TPR and TNR for 3 and 7 day forecasts for the straight split ordering, calculated over the more recent test set (mid 2013-2017), compared to the same metrics using the opposite order split, retraining the models in more recent dataset and calculating the test set at earlier years of 1982 to mid-1985.

|                       | 3-day Forecast |              | 7-day forecast |               |
|-----------------------|----------------|--------------|----------------|---------------|
| Dataset order         | TPR            | TNR          | TPR            | TNR           |
| <b>Straight split</b> | <b>0.881</b>   | <b>0.891</b> | 0.7570         | 0.7921        |
| <b>Opposite split</b> | 0.7529         | 0.8423       | <b>0.8119</b>  | <b>0.8730</b> |
